# Supplementary material
Source: ML conference proceedings conference paper supplement (https://proceedings.neurips.cc/paper_files/paper/2022/hash/da645920dcd3bd35b0dae329894bad80-Abstract.html)
Supplement: Supplementary file 1 [file da645920dcd3bd35b0dae329894bad80-Supplemental-Conference.pdf]

## A Missing privacy proofs

### A.1 Proof of Lemma 2.3

We restate the lemma for convenience.

**Lemma 2.3.** *Let  $M_1 : \mathbb{G} \rightarrow \mathcal{M}_1$  be a randomized algorithm that is  $(\epsilon, \delta)$ -DP. Suppose  $B \subseteq \mathcal{M}_1$  is a set of "bad outcomes" with  $\Pr[M_1(G) \in B] \leq \delta^*$  for any  $G \in \mathbb{G}$ . Further let  $M_2 : \mathbb{G} \times \mathcal{M}_1 \rightarrow \mathcal{M}_2$  be a deterministic algorithm such that for every fixed "non-bad"  $m_1 \in \mathcal{M}_1 \setminus B$  we have  $M_2(G, m_1) = M_2(G', m_1)$  for adjacent  $G, G' \in \mathbb{G}$ . Then the composed mechanism  $\mathbb{G} \ni G \mapsto M_2(G, M_1(G)) \in \mathcal{M}_2$  is  $(\epsilon, \delta + \delta^*)$ -DP.*

The proof is routine:

*Proof.* Fix  $G, G' \in \mathbb{G}$  and a set of outcomes  $S_2 \subseteq \mathcal{M}_2$ . Define

$$S_1^* := \{m_1 \in \mathcal{M}_1 \setminus B : M_2(G, m_1) \in S_2\}.$$

By assumption we have

$$S_1^* = \{m_1 \in \mathcal{M}_1 \setminus B : M_2(G', m_1) \in S_2\}. \quad (4)$$

Now we can write

$$\begin{aligned} \Pr[M_2(G, M_1(G)) \in S_2] &\leq \Pr[M_1(G) \in B] + \Pr[M_1(G) \notin B \text{ and } M_2(G, M_1(G)) \in S_2] \\ &\leq \delta^* + \Pr[M_1(G) \in S_1^*] \\ &\stackrel{\text{DP}}{\leq} \delta^* + e^\epsilon \cdot \Pr[M_1(G') \in S_1^*] + \delta \\ &\stackrel{(4)}{=} \delta^* + e^\epsilon \cdot \Pr[M_1(G') \notin B \text{ and } M_2(G', M_1(G')) \in S_2] + \delta \\ &\leq \delta^* + e^\epsilon \cdot \Pr[M_2(G', M_1(G')) \in S_2] + \delta. \end{aligned}$$

□

### A.2 Proof of Theorem 4.4

We restate the theorem for convenience.

**Theorem 4.4.** *By a state let us denote the noised-agreement status of all edges in  $E(G) \cup E(G')$  and heavy/light status of all vertices. Under a fixed state, consider Line 4 as a deterministic algorithm that, given  $G$  or  $G'$ , outputs the final clustering. Then this clustering does not depend on whether the input graph is  $G$  or  $G'$ , except on a set of states that arises with probability at most  $\frac{3}{4}\delta$  (when steps before Line 4 are executed on either of  $G$  or  $G'$ ).*

Let us analyze how adding a single edge  $(x, y)$  can influence the output of Line 4. Namely, we will show that it cannot, unless at least one of certain bad events happens. We will list a collection of these bad events, and then we will upper-bound their probability.

First, **if  $x$  and  $y$  are not in noised agreement**, then  $(x, y)$  was removed in Line 2 and the two outputs will be the same. In the remainder we assume that  $x$  and  $y$  are in noised agreement. Similarly, we can assume that  $x, y \in H$  (otherwise they cannot be in noised agreement).

**If  $x$  and  $y$  are both light**, then similarly  $(x, y)$  will be removed in Line 4 and the two outputs will be the same.

**If  $x$  and  $y$  are both heavy**, then  $(x, y)$  will survive in  $\tilde{G}$ . It will affect the output if and only if it connects two components that would otherwise not be connected. However, intuitively this is unlikely, because  $x$  and  $y$  are heavy and in noised agreement and thus they should have common neighbors in  $\tilde{G}$ . Below (Lemma A.3) we will show that if no bad events (also defined below) happen, then  $x$  and  $y$  indeed have common neighbors in  $\tilde{G}$ .

**If  $x$  is heavy and  $y$  is light**, then similarly  $(x, y)$  will survive in  $\tilde{G}$ , and it will affect the output if and only if it connects two components that would otherwise not be connected and that each contain a heavy vertex. More concretely, we claim that if the outputs are not equal, then  $y$  must have a heavy neighbor  $z \neq x$  (in  $\tilde{G}$ ) that has no common neighbors with  $x$  (except possibly  $y$ ). For otherwise:

- if  $y$  has a heavy neighbor  $z \neq x$  that does have a common neighbor with  $x$  (that is not  $y$ ), then  $x$  and  $y$  are in the same component in  $\tilde{G}$  regardless of the presence of  $(x, y)$ ,
- if  $y$  has no heavy neighbor except  $x$ , then (as light-light edges are removed)  $y$  only has at most  $x$  as a neighbor and therefore  $(x, y)$  does not influence the output.

Let us call such a neighbor  $z$  a *bad neighbor*. Below (Lemma A.4) we will show that if no bad events (also defined below) happen, then  $y$  has no bad neighbors.

Finally, **if  $x$  is light and  $y$  is heavy**: analogous to the previous point. We will require that  $x$  have no bad neighbor, i.e., neighbor  $z \neq y$  that has no common neighbors with  $y$ .

**Bad events.** We start with two helpful definitions.

**Definition A.1.** We say that a vertex  $v$  is TV-light (Truly Very light) if  $l(v) \geq (\lambda + \lambda')d(v)$ , i.e.,  $v$  lost a  $(\lambda + \lambda')$ -fraction of its neighbors in Line 2.

**Definition A.2.** We say that two vertices  $u, v$  TV-disagree (Truly Very disagree) if  $|N(u) \Delta N(v)| \geq (\beta + \beta') \max(d(u), d(v))$ .

Recall from Section 3 that we can set  $\lambda' = \beta' = 0.1$ .

Our bad events are the following:

1.  $x$  and  $y$  TV-disagree but are in noised agreement,
2.  $x$  is TV-light but is heavy,
3. the same for  $y$ ,
4.  $x \in H$  but  $d(x) < T_1$ ,
5. the same for  $y$ ,
6. for each  $z \in N(y) \setminus \{x, y\}$ :
  - 6a.  $y$  and  $z$  do not TV-disagree, and  $z$  is TV-light but is heavy, (or)
  - 6b.  $y$  and  $z$  TV-disagree, but are in noised agreement.
7. similarly for each  $z \in N(x) \setminus \{x, y\}$ .

Recall that we can assume that  $x, y \in H$ , so if bad event 4 does not happen, we have

$$d(x) \geq T_1 \tag{5}$$

and similarly for  $y$  and bad event 5.

**Heavy-heavy case.** Let us denote the neighbors of a vertex  $v$  in  $\tilde{G}$  by  $\tilde{N}(v)$ ; also here we adopt the convention that  $v \in \tilde{N}(v)$ .

**Lemma A.3.** If  $x$  and  $y$  are heavy and bad events 1–5 do not happen, then  $|\tilde{N}(x) \cap \tilde{N}(y)| \geq 3$ , i.e.,  $x$  and  $y$  have another common neighbor in  $\tilde{G}$ .

*Proof.* Recall that we can assume that  $x$  and  $y$  are in noised agreement (otherwise the two outputs are equal). Since bad event 1 does not happen,  $x$  and  $y$  do not TV-disagree, i.e.,

$$|N(x) \Delta N(y)| < (\beta + \beta') \max(d(x), d(y)).$$

From this we get  $\min(d(x), d(y)) \geq (1 - \beta - \beta') \max(d(x), d(y))$  and thus  $d(x) + d(y) = \min(d(x), d(y)) + \max(d(x), d(y)) \geq (2 - \beta - \beta') \max(d(x), d(y))$  and so

$$|N(x) \Delta N(y)| < \frac{\beta + \beta'}{2 - \beta - \beta'} (d(x) + d(y)).$$

Since  $x$  is heavy but bad event 2 does not happen,  $x$  is not TV-light, i.e.,  $l(x) < (\lambda + \lambda')d(x)$ . Moreover,  $l(x) = |N(x) \setminus \tilde{N}(x)|$  because  $x$  is heavy (so there are no light-light edges incident to it). We use bad event 3 similarly for  $y$ .

We will use the following property of any two sets  $A, B$ :

$$|A \cap B| = \frac{|A| + |B| - |A \Delta B|}{2}.$$

Taking these together, we have

$$\begin{aligned} |\tilde{N}(x) \cap \tilde{N}(y)| &\geq |N(x) \cap N(y)| - |N(x) \setminus \tilde{N}(x)| - |N(y) \setminus \tilde{N}(y)| \\ &= \frac{d(x) + d(y) - |N(x) \Delta N(y)|}{2} - l(x) - l(y) \\ &\geq \frac{1 - \beta - \beta'}{2 - \beta - \beta'} (d(x) + d(y)) - (\lambda + \lambda') (d(x) + d(y)) \\ &= \left( \frac{1 - \beta - \beta'}{2 - \beta - \beta'} - \lambda - \lambda' \right) (d(x) + d(y)) \\ &\geq 3, \end{aligned}$$

where the last inequality follows since

$$\frac{1 - \beta - \beta'}{2 - \beta - \beta'} - \lambda - \lambda' \geq \frac{1 - 0.2 - 0.1}{2} - 0.2 - 0.1 = 0.05 > 0$$

and as, by (5), we have  $d(x) + d(y) \geq 2T_1$ , and  $T_1$  is large enough:

$$T_1 \geq \frac{1.5}{\frac{1 - \beta - \beta'}{2 - \beta - \beta'} - \lambda - \lambda'}. \quad (6)$$

□

**Heavy–light case.** Without loss of generality assume that  $x$  is heavy and  $y$  is light. Recall that a bad neighbor of  $y$  is a vertex  $z \in \tilde{N}(y) \setminus \{x, y\}$  that is heavy and has no common neighbors with  $x$  (except possibly  $y$ ).

**Lemma A.4.** *If  $x$  is heavy,  $y$  is light, and bad events do not happen, then  $y$  has no bad neighbors.*

*Proof.* Suppose that a vertex  $z \in \tilde{N}(y) \setminus \{x, y\}$  is heavy; we will show that  $z$  must have common neighbors with  $x$ .

Since  $z \in \tilde{N}(y)$ , we have that  $y$  and  $z$  must be in noised agreement (otherwise  $(y, z)$  would have been removed). Since bad event 6b does not happen,  $y$  and  $z$  do not TV-disagree, i.e.,

$$|N(y) \Delta N(z)| < (\beta + \beta') \max(d(y), d(z))$$

which also implies that  $d(z) \geq (1 - \beta - \beta')d(y)$ .

Since bad event 6a does not happen, and  $y$  and  $z$  do not TV-disagree, and  $z$  is heavy, thus  $z$  is not TV-light, i.e.,  $l(z) < (\lambda + \lambda')d(z)$ .

As in the proof of Lemma A.3, since bad events 1 and 2 do not happen, we have

$$|N(x) \Delta N(y)| < (\beta + \beta') \max(d(x), d(y)),$$

which also implies that  $d(x) \geq (1 - \beta - \beta')d(y)$  and  $l(x) < (\lambda + \lambda')d(x)$ . Similarly as in that proof, we write

$$\begin{aligned}
|\tilde{N}(x) \cap \tilde{N}(z)| &\geq |N(x) \cap N(z)| - |N(x) \setminus \tilde{N}(x)| - |N(z) \setminus \tilde{N}(z)| \\
&= \frac{d(x) + d(z) - |N(x) \Delta N(z)|}{2} - l(x) - l(z) \\
&\geq \frac{d(x) + d(z) - |N(x) \Delta N(y)| - |N(y) \Delta N(z)|}{2} - l(x) - l(z) \\
&\geq \frac{d(x) + d(z) - (\beta + \beta')(d(x) + d(z))}{2} - (\lambda + \lambda')(d(x) + d(z)) \\
&= (1 - \beta - \beta' - 2(\lambda + \lambda')) \frac{d(x) + d(z)}{2} \\
&\geq (1 - \beta - \beta' - 2(\lambda + \lambda')) \frac{d(x) + (1 - \beta - \beta')d(y)}{2} \\
&\geq (1 - \beta - \beta' - 2(\lambda + \lambda')) \frac{2 - \beta - \beta'}{2} T_1 \\
&\geq 2,
\end{aligned}$$

where the second-last inequality follows as, by (5), we have  $d(x), d(y) \geq T_1$ , and the last inequality follows because

$$1 - \beta - \beta' - 2(\lambda + \lambda') \geq 1 - 0.2 - 0.1 - 2 \cdot (0.2 + 0.1) \geq 0.1 > 0$$

and  $T_1$  is large enough:

$$T_1 \geq \frac{2 \cdot 2}{(1 - \beta - \beta' - 2(\lambda + \lambda'))(2 - \beta - \beta')}. \quad (7)$$

□

**Bounding the probability of bad events.** Roughly, our strategy is to union-bound over all the bad events.

**Fact A.5.** Let  $A, c, d \geq 0$ . If  $d \geq \frac{\ln(\frac{c}{\delta})}{A}$ , then  $\frac{1}{2} \exp(-A \cdot d) \leq \frac{\delta}{c}$ .

*Proof.* A straightforward calculation. □

**Claim A.6.** The probability of bad event 1, conditioned on bad events 4 and 5 not happening, is at most  $\delta/8$ .

*Proof.* Start by recalling that by (5),  $d(x), d(y) \geq T_1$ . We have that the sought probability is at most

$$\Pr[\mathcal{E}_{x,y} < -\beta' \cdot \max(d(x), d(y))] \leq \frac{1}{2} \exp\left(-\frac{\beta' \cdot \max(d(x), d(y))}{\mathcal{E}}\right)$$

where we use  $\mathcal{E}$  to denote the magnitude of  $\mathcal{E}_{x,y}$ , i.e.,

$$\mathcal{E} = \max\left(1, \frac{\gamma \sqrt{\max(d(x), d(y)) \cdot \ln(1/\delta_{\text{agr}})}}{\epsilon_{\text{agr}}}\right).$$

We will satisfy both

$$\frac{1}{2} \exp(-\beta' \cdot \max(d(x), d(y))) \leq \frac{\delta}{8}$$

and

$$\frac{1}{2} \exp\left(-\frac{\epsilon_{\text{agr}} \cdot \beta' \cdot \max(d(x), d(y))}{\gamma \sqrt{\max(d(x), d(y)) \cdot \ln(1/\delta_{\text{agr}})}}\right) \leq \frac{\delta}{8}.$$

For the former, by applying Fact A.5 (for  $c = 8$ ,  $A = \beta'$  and  $d = \max(d(x), d(y))$ ) we get that it is enough to have  $\max(d(x), d(y)) \geq \frac{\ln(4/\delta)}{\beta'}$ , which holds when  $T_1$  is large enough:

$$T_1 \geq \frac{\ln(4/\delta)}{\beta'}. \quad (8)$$

For the latter, we want to satisfy

$$\frac{1}{2} \exp\left(-\frac{\epsilon_{\text{agr}} \cdot \beta' \cdot \sqrt{\max(d(x), d(y))}}{\gamma \sqrt{\ln(1/\delta_{\text{agr}})}}\right) \leq \frac{\delta}{8}.$$

Use Fact A.5 (for  $c = 8$ ,  $A = \frac{\epsilon_{\text{agr}} \cdot \beta'}{\gamma \sqrt{\ln(1/\delta_{\text{agr}})}}$  and  $d = \sqrt{\max(d(x), d(y))}$ ) to get that it is enough to have

$$\sqrt{\max(d(x), d(y))} \geq \frac{\ln(4/\delta) \cdot \gamma \cdot \sqrt{\ln(1/\delta_{\text{agr}})}}{\epsilon_{\text{agr}} \cdot \beta'},$$

which is true when  $T_1$  is large enough:

$$T_1 \geq \left(\frac{\ln(4/\delta) \cdot \gamma}{\epsilon_{\text{agr}} \cdot \beta'}\right)^2 \cdot \ln(1/\delta_{\text{agr}}). \quad (9)$$

□

**Claim A.7.** *The probability of bad event 2, conditioned on bad events 4 and 5 not happening, is at most  $\delta/32$ .*

*Proof.* Start by recalling that by (5),  $d(x) \geq T_1$ . If  $x$  is TV-light but heavy, then we must have  $Y_x < \lambda' \cdot d(x)$ . We have that the sought probability is at most

$$\frac{1}{2} \exp\left(-\frac{\lambda' \cdot d(x) \cdot \epsilon}{8}\right)$$

and by Fact A.5 (with  $c = 32$ ,  $d = d(x)$  and  $A = \frac{\lambda' \cdot \epsilon}{8}$ ) this is at most  $\delta/32$  because  $d(x) \geq T_1$  and  $T_1$  is large enough:

$$T_1 \geq \frac{8 \ln(16/\delta)}{\lambda' \cdot \epsilon}. \quad (10)$$

□

**Claim A.8.** *The probability of bad event 4 is at most  $\delta/32$ .*

*Proof.* For bad event 4 to happen, we must have  $Z_x \geq T_0 - T_1 = \frac{8 \ln(16/\delta)}{\epsilon}$ ; as  $Z_x \sim \text{Lap}(8/\epsilon)$ , this happens with probability  $\frac{1}{2} \exp(-\ln(16/\delta)) = \delta/32$ . □

The following two facts are more involved versions of Fact A.5.

**Fact A.9.** *Let  $A, d \geq 0$ . If  $d \geq \frac{1.6 \ln(\frac{4}{\delta A})}{A}$ , then  $\frac{1}{2} \exp(-A \cdot d) \leq \frac{\delta}{8d}$ .*

*Proof.* We use the following analytic inequality: for  $\alpha, x > 0$ , if  $x \geq 1.6 \ln(\alpha)$ , then  $x \geq \ln(\alpha x)$ . We substitute  $x = A \cdot d$  and  $\alpha = \frac{4}{\delta A}$ . Then by the analytic inequality,  $A \cdot d \geq \ln\left(\frac{4d}{\delta}\right)$ . Negate and then exponentiate both sides. □

**Fact A.10.** *Let  $A, d \geq 0$ . If  $\sqrt{d} \geq \frac{2.8 \cdot \left(1 + \ln\left(\frac{2}{\sqrt{\delta A}}\right)\right)}{A}$ , then  $\frac{1}{2} \exp(-A \cdot \sqrt{d}) \leq \frac{\delta}{8d}$ .*

*Proof.* We use the following analytic inequality: for  $\alpha, x > 0$ , if  $x \geq 2.8(\ln(\alpha) + 1)$ , then  $x \geq 2 \ln(\alpha x)$ . We substitute  $x = A \sqrt{d}$  and  $\alpha = \frac{2}{\sqrt{\delta A}}$ . Then by the analytic inequality,  $A \cdot \sqrt{d} \geq \ln\left(\frac{4d}{\delta}\right)$ . Negate and then exponentiate both sides. □

**Claim A.11.** *For any  $z \in N(y) \setminus \{x, y\}$ , the probability of bad event 6a for  $z$ , conditioned on bad events 4 and 5 not happening, is at most  $\frac{\delta}{8d(y)}$ .*

*Proof.* The proof is similar as for Claim A.7 but somewhat more involved as  $d(y)$  appears also in the probability bound.

When  $z$  is TV-light but heavy, we must have  $Y_z < -\lambda' \cdot d(z)$ . When  $y$  and  $z$  do not TV-disagree, we have  $d(z) \geq (1-\beta-\beta')d(y)$ . Thus, if bad event 6a happens, we must have  $Y_z < -\lambda' \cdot (1-\beta-\beta')d(y)$ . Thus the sought probability is at most

$$\Pr [Y_z < -\lambda' \cdot (1-\beta-\beta')d(y)] = \frac{1}{2} \exp \left( -\frac{\lambda' \cdot (1-\beta-\beta')d(y) \cdot \epsilon}{8} \right).$$

By Fact A.9 (invoked for  $d = d(y)$  and  $A = \frac{\lambda' \cdot (1-\beta-\beta') \cdot \epsilon}{8}$ ), this is at most  $\frac{\delta}{8d(y)}$  because  $d(y) \geq T_1$  by (5) and  $T_1$  is large enough:

$$T_1 \geq \frac{1.6 \ln \left( \frac{4 \cdot 8}{\delta \lambda' \cdot (1-\beta-\beta') \cdot \epsilon} \right) \cdot 8}{\lambda' \cdot (1-\beta-\beta') \cdot \epsilon}. \quad (11)$$

□

**Claim A.12.** For any  $z \in N(y) \setminus \{x, y\}$ , the probability of bad event 6b for  $z$ , conditioned on bad events 4 and 5 not happening, is at most  $\frac{\delta}{8d(y)}$ .

*Proof.* The proof is similar as for Claim A.6 but somewhat more involved as  $d(y)$  appears also in the probability bound. Start by recalling that by (5),  $d(y) \geq T_1$ . We have that the sought probability is at most

$$\Pr [\mathcal{E}_{y,z} < -\beta' \cdot \max(d(y), d(z))] \leq \frac{1}{2} \exp \left( -\frac{\beta' \cdot \max(d(y), d(z))}{\mathcal{E}} \right)$$

where we use  $\mathcal{E}$  to denote the magnitude of  $\mathcal{E}_{y,z}$ , i.e.,

$$\mathcal{E} = \max \left( 1, \frac{\gamma \sqrt{\max(d(y), d(z)) \cdot \ln(1/\delta_{\text{agr}})}}{\epsilon_{\text{agr}}} \right).$$

We will satisfy both

$$\frac{1}{2} \exp(-\beta' \cdot \max(d(y), d(z))) \leq \frac{1}{2} \exp(-\beta' \cdot d(y)) \leq \frac{\delta}{8d(y)} \quad (12)$$

and

$$\frac{1}{2} \exp \left( -\frac{\epsilon_{\text{agr}} \cdot \beta' \cdot \max(d(y), d(z))}{\gamma \sqrt{\max(d(y), d(z)) \cdot \ln(1/\delta_{\text{agr}})}} \right) \leq \frac{1}{2} \exp \left( -\frac{\epsilon_{\text{agr}} \cdot \beta' \cdot \sqrt{d(y)}}{\gamma \sqrt{\ln(1/\delta_{\text{agr}})}} \right) \leq \frac{\delta}{8d(y)}. \quad (13)$$

For the former, by applying Fact A.9 (for  $A = \beta'$  and  $d = d(y)$ ) we get that (12) holds because  $d(y) \geq T_1$  and  $T_1$  is large enough:

$$T_1 \geq \frac{1.6 \ln \left( \frac{4}{\delta \cdot \beta'} \right)}{\beta'}. \quad (14)$$

For the latter, by applying Fact A.10 (for  $A = \frac{\epsilon_{\text{agr}} \cdot \beta'}{\gamma \sqrt{\ln(1/\delta_{\text{agr}})}}$  and  $d = d(y)$ ) we get that (13) holds because  $d(y) \geq T_1$  and  $T_1$  is large enough:

$$T_1 \geq \left( \frac{2.8 \left( 1 + \ln \left( \frac{2}{\sqrt{\delta} A} \right) \right)}{A} \right)^2 = \left( \frac{2.8 \left( 1 + \ln \left( \frac{2\gamma \sqrt{\ln(1/\delta_{\text{agr}})}}{\sqrt{\delta} \epsilon_{\text{agr}} \cdot \beta'} \right) \right) \gamma \sqrt{\ln(1/\delta_{\text{agr}})}}{\epsilon_{\text{agr}} \cdot \beta'} \right)^2. \quad (15)$$

□

Now we may conclude the proof of Theorem 4.4. We use the property that if  $A, B$  are events, then  $\Pr [A \cup B] \leq \Pr [A] + \Pr [B \mid \text{not } A]$  (with  $A$  being bad events 4 or 5). By Claim A.8, the probability of bad events 4 or 5 is at most  $\delta/16$ . Conditioned on these not happening, bad event 1 is handled by Claim A.6 and bad events 2–3 are handled by Claim A.7; these incur  $\delta/8 + 2 \cdot \delta/32$ , in total  $\delta/4$  so far. Next, there are  $d(y)$  bad events of type 6a (and the same for 6b), thus we get  $2 \cdot d(y) \cdot \frac{\delta}{8d(y)} = \delta/4$  by Claims A.11 and A.12; and we get the same from bad events 7a and 7b. Summing everything up yields  $\frac{3}{4}\delta$ . ■

## B Proofs Missing from Section 5

### B.1 Proof of Lemma 5.1

First, we prove the following claim.

**Lemma B.1.** *Let  $\overline{\beta^L}, \overline{\beta^U} \in \mathbb{R}_{\geq 0}^{V \times V}$  and  $\overline{\lambda^L}, \overline{\lambda^U} \in \mathbb{R}_{\geq 0}^V$  such that  $\overline{\beta^U} \geq \overline{\beta^L}$  and  $\overline{\lambda^U} \geq \overline{\lambda^L}$ . Let  $E_{rem}$  be a subset of edges. Then, the following holds:*

- (A) *If  $v$  is light in  $\text{ALG-CC}(\overline{\beta^U}, \overline{\lambda^U}, E_{rem})$ , then  $v$  is light in  $\text{ALG-CC}(\overline{\beta^L}, \overline{\lambda^L}, E_{rem})$ .*
- (B) *If  $v$  is heavy in  $\text{ALG-CC}(\overline{\beta^L}, \overline{\lambda^L}, E_{rem})$ , then  $v$  is heavy in  $\text{ALG-CC}(\overline{\beta^U}, \overline{\lambda^U}, E_{rem})$ .*
- (C) *If an edge  $e$  is removed in  $\text{ALG-CC}(\overline{\beta^U}, \overline{\lambda^U}, E_{rem})$ , then  $e$  is removed in  $\text{ALG-CC}(\overline{\beta^L}, \overline{\lambda^L}, E_{rem})$  as well.*
- (D) *If an edge  $e$  remains in  $\text{ALG-CC}(\overline{\beta^L}, \overline{\lambda^L}, E_{rem})$ , then  $e$  remains in  $\text{ALG-CC}(\overline{\beta^U}, \overline{\lambda^U}, E_{rem})$  as well.*

*Proof.* Observe that  $|N(u) \Delta N(v)| \leq \overline{\beta^L}_{u,v} \max\{d(u), d(v)\}$  implies  $|N(u) \Delta N(v)| \leq \overline{\beta^U}_{u,v} \max\{d(u), d(v)\}$  as  $\overline{\beta^L}_{u,v} \leq \overline{\beta^U}_{u,v}$ . Hence, if  $u$  and  $v$  are in agreement in  $\text{ALG-CC}(\overline{\beta^L}, \overline{\lambda^L}, E_{rem})$ , then  $u$  and  $v$  are in agreement in  $\text{ALG-CC}(\overline{\beta^U}, \overline{\lambda^U}, E_{rem})$  as well. Similarly, if  $u$  and  $v$  are not in agreement in  $\text{ALG-CC}(\overline{\beta^U}, \overline{\lambda^U}, E_{rem})$ , then  $u$  and  $v$  are not in agreement in  $\text{ALG-CC}(\overline{\beta^L}, \overline{\lambda^L}, E_{rem})$  as well. These observations immediately yield Properties (A) and (B).

To prove Properties (C) and (D), observe that an edge  $e = \{u, v\}$  is removed from a graph if  $u$  and  $v$  are not in agreement, or if  $u$  and  $v$  are light, or if  $e \in E_{rem}$ . From our discussion above and from Property (A), if  $e$  is removed from  $\text{ALG-CC}(\overline{\beta^U}, \overline{\lambda^U}, E_{rem})$ , then  $e$  is removed from  $\text{ALG-CC}(\overline{\beta^L}, \overline{\lambda^L}, E_{rem})$  as well. On the other hand,  $e \notin E_{rem}$  remains in  $\text{ALG-CC}(\overline{\beta^L}, \overline{\lambda^L}, E_{rem})$  if  $u$  and  $v$  are in agreement, and if  $u$  or  $v$  is heavy. Property (B) and our discussion about vertices in agreement imply Property (D).<sup>1</sup>  $\square$

As a corollary, we obtain the proof of Lemma 5.1.

**Lemma 5.1.** *Let  $\overline{\beta^L}, \overline{\beta^U} \in \mathbb{R}_{\geq 0}^{V \times V}$  and  $\overline{\lambda^L}, \overline{\lambda^U} \in \mathbb{R}_{\geq 0}^V$  such that  $\overline{\beta^U} \geq \overline{\beta^L}$  and  $\overline{\lambda^U} \geq \overline{\lambda^L}$ .*

- (i) *If  $u$  and  $v$  are in the same cluster of  $\text{ALG-CC}(\overline{\beta^L}, \overline{\lambda^L}, E_{rem})$ , then  $u$  and  $v$  are in the same cluster of  $\text{ALG-CC}(\overline{\beta^U}, \overline{\lambda^U}, E_{rem})$ .*
- (ii) *If  $u$  and  $v$  are in different clusters of  $\text{ALG-CC}(\overline{\beta^U}, \overline{\lambda^U}, E_{rem})$ , then  $u$  and  $v$  are different clusters of  $\text{ALG-CC}(\overline{\beta^L}, \overline{\lambda^L}, E_{rem})$ .*

*Proof.* (i) Consider a path  $P$  between  $u$  and  $v$  that makes them being in the same cluster/component in  $\text{ALG-CC}(\overline{\beta^L}, \overline{\lambda^L}, E_{rem})$ . Then, by Lemma B.1 (D)  $P$  remains in  $\text{ALG-CC}(\overline{\beta^U}, \overline{\lambda^U}, E_{rem})$  as well. Hence,  $u$  and  $v$  are in the same cluster of  $\text{ALG-CC}(\overline{\beta^U}, \overline{\lambda^U}, E_{rem})$ .

- (ii) Follows from Property (i) by contraposition.  $\square$

### B.2 Proof of Lemma 5.3

We begin by proving the following claim.

<sup>1</sup>Also, by contraposition, Property (D) follows from Property (C) and Property (B) follows from Property (A).

**Lemma B.2.** Let  $\text{ALG-CC}'$  be a version of  $\text{ALG-CC}$  that does not make singletons of light vertices on Line 4 of Algorithm 2. Let  $\bar{\beta} \in \mathbb{R}_{\geq 0}^{V \times V}$  and  $\bar{\lambda} \in \mathbb{R}_{\geq 0}^V$  be two constant vectors, i.e.,  $\bar{\beta} = \beta \bar{1}$  and  $\bar{\lambda} = \lambda \bar{1}$ . Assume that  $5\beta + 2\lambda < 1$ . Then, it holds

$$\text{cost}(\text{ALG-CC}'(\bar{\beta}, \bar{\lambda}, E_{\leq T})) \leq O(\text{OPT}/(\beta\lambda)) + O(n \cdot T/(1 - 4\beta)^3),$$

where  $\text{OPT}$  denotes the cost of the optimum clustering for the input graph.

*Proof.* Consider a non-singleton cluster  $C$  output by  $\text{ALG-CC}'(\bar{\beta}, \bar{\lambda}, \emptyset)$ . Let  $u$  be a vertex in  $C$ . We now show that for any  $v \in C$ , such that  $u$  or  $v$  is heavy, it holds that  $d(v) \geq (1 - 4\beta)d(u)$ . To that end, we recall that in [CALM<sup>+</sup>21] (Lemma 3.3 of the arXiv version) it was shown that

$$|N(u) \Delta N(v)| \leq 4\beta \max\{d(u), d(v)\}. \quad (16)$$

Assume that  $d(u) \geq d(v)$ , as otherwise  $d(v) \geq (1 - 4\beta)d(u)$  holds directly. Then, from Eq. (16) we have

$$d(u) - d(v) \leq |N(u) \Delta N(v)| \leq 4\beta d(u),$$

further implying

$$d(v) \geq (1 - 4\beta)d(u).$$

Moreover, this provides a relation between  $d(v)$  and  $d(u)$  even if both vertices are light. To see that, fix any heavy vertex  $z$  in the cluster. Any vertex  $u$  has  $d(u) \leq d(z)/(1 - 4\beta)$  and also  $d(u) \geq (1 - 4\beta)d(z)$ . This implies that if  $u$  and  $v$  belong to the same cluster than  $d(u) \geq (1 - 4\beta)^2 d(v)$ , even if both  $u$  and  $v$  are light.

Let  $E_{\leq T}$  be a subset (any such) of edges incident to vertices with degree at most  $T$ . We will show that forcing  $\text{ALG-CC}'$  to remove  $E_{\leq T}$  does not affect how vertices of degree at least  $T/(1 - 4\beta)^3$  are clustered by  $\text{ALG-CC}'$ . To see that, observe that a vertex  $x$  having degree at most  $T$  and a vertex  $y$  having degree at least  $T/(1 - \beta) + 1$  are not in agreement. Hence, forcing  $\text{ALG-CC}'$  to remove  $E_{\leq T}$  does not affect whether vertex  $y$  is light or not.

However, removing  $E_{\leq T}$  might affect whether a vertex  $z$  with degree  $T/(1 - \beta) < T/(1 - 4\beta)$  is light or not. Nevertheless, from our discussion above, a vertex  $y$  with degree at least  $T/(1 - 4\beta)^3$  is not clustered together with  $z$  by  $\text{ALG-CC}'(\beta, \lambda, \emptyset)$ , regardless of whether  $z$  is heavy or light.

This implies that the cost of clustering vertices of degree at least  $T/(1 - 4\beta)^3$  by  $\text{ALG-CC}'(\beta, \lambda, E_{\leq T})$  is upper-bounded by  $\text{cost}(\text{ALG-CC}'(\bar{\beta}, \bar{\lambda}, \emptyset)) \leq O(\text{OPT}/(\beta\lambda))$ . Notice that the inequality follows since  $\text{ALG-CC}'(\bar{\beta}, \bar{\lambda}, \emptyset)$  is a  $O(1/(\beta\lambda))$ -approximation of  $\text{OPT}$  and  $\beta < 0.2$ .

It remains to account for the cost effect of  $\text{ALG-CC}'(\bar{\beta}, \bar{\lambda}, E_{\leq T})$  on the vertices of degree less than  $T/(1 - 4\beta)^3$ . This part of the analysis follows from the fact that forcing  $\text{ALG-CC}'$  to remove  $E_{\leq T}$  only reduces connectivity compared to the output of  $\text{ALG-CC}'$  without removing  $E_{\leq T}$ . That is, in addition to removing edges even between vertices that might be in agreement, removal of  $E_{\leq T}$  increases a chance for a vertex to become light. Hence, the clusters of  $\text{ALG-CC}'$  with removals of  $E_{\leq T}$  are only potentially further clustered compared to the output of  $\text{ALG-CC}'$  without the removal. This means that  $\text{ALG-CC}'$  with the removal of  $E_{\leq T}$  potentially cuts additional “+” edges, but it does not include additional “-” edges in the same cluster. Given that only vertices of degree at most  $T/(1 - 4\beta)^3$  are affected, the number of additional “+” edges cut is  $O(n \cdot T/(1 - 4\beta)^3)$ .

This completes the analysis.  $\square$

**Lemma 5.3.** Let Algorithm 1' be a version of Algorithm 1 that does not make singletons of light vertices on Line 4. Assume that  $5\beta + 2\lambda < 1/1.1$  and also assume that  $\beta$  and  $\lambda$  are positive constants. With probability at least  $1 - n^{-2}$ , Algorithm 1' provides a solution which has  $O(1)$  multiplicative and  $O\left(n \cdot \left(\frac{\log n}{\epsilon} + \frac{\log^2 n \cdot \log(1/\delta)}{\min(1, \epsilon^2)}\right)\right)$  additive approximation.

*Proof.* We now analyze under which condition noised agreement and  $\hat{l}(v)$  can be seen as a slight perturbation of  $\beta$  and  $\lambda$ . That will enable us to employ Lemmas 5.2 and B.2 to conclude the proof of this theorem.



**Analyzing noised agreement.** Recall that a noised agreement (Definition 3.1) states

$$|N(u)\Delta N(v)| + \mathcal{E}_{u,v} < \beta \cdot \max(d(u), d(v)).$$

This inequality can be rewritten as

$$|N(u)\Delta N(v)| < \left(1 - \frac{\mathcal{E}_{u,v}}{\beta \cdot \max(d(u), d(v))}\right) \beta \cdot \max(d(u), d(v)).$$

As a reminder,  $\mathcal{E}_{u,v}$  is drawn from  $\text{Lap}(C_{u,v} \cdot \sqrt{\max(d(u), d(v)) \ln(1/\delta)}/\epsilon_{\text{agr}})$ , where  $C_{u,v}$  can be upper-bounded by  $C = \sqrt{4\epsilon_{\text{agr}} + 1} + 1$ . Let  $b = C \cdot \sqrt{\max(d(u), d(v)) \ln(1/\delta)}/\epsilon_{\text{agr}}$ . From Fact 2.5 we have that

$$\Pr[|\mathcal{E}_{u,v}| > 5 \cdot b \cdot \log n] \leq n^{-5}.$$

Therefore, with probability at least  $1 - n^{-5}$  we have that

$$\left| \frac{\mathcal{E}_{u,v}}{\beta \cdot \max(d(u), d(v))} \right| \leq \frac{5 \cdot \log n \cdot C \cdot \sqrt{\max(d(u), d(v)) \ln(1/\delta)}}{\epsilon_{\text{agr}} \cdot \beta \cdot \max(d(u), d(v))} = \frac{5 \cdot \log n \cdot C \cdot \sqrt{\ln(1/\delta)}}{\epsilon_{\text{agr}} \cdot \beta \cdot \sqrt{\max(d(u), d(v))}}$$

Therefore, for  $\max(d(u), d(v)) \geq \frac{2500 \cdot C^2 \cdot \log^2 n \cdot \log(1/\delta)}{\beta^2 \cdot \epsilon_{\text{agr}}^2}$  we have that with probability at least  $1 - n^{-5}$  it holds

$$1 - \frac{\mathcal{E}_{u,v}}{\beta \cdot \max(d(u), d(v))} \in [9/10, 11/10].$$

**Analyzing noised  $l(v)$ .** As a reminder,  $\hat{l}(v) = l(v) + Y_v$ , where  $Y_v$  is drawn from  $\text{Lap}(8/\epsilon)$ . The condition  $\hat{l}(v) > \lambda d(v)$  can be rewritten as

$$l(v) > \left(1 - \frac{Y_v}{\lambda d(v)}\right) \lambda d(v).$$

Also, we have

$$\Pr\left[|Y_v| > \frac{40 \log n}{\epsilon}\right] < n^{-5}.$$

Hence, if  $d(v) \geq \frac{400 \log n}{\lambda \epsilon}$  then with probability at least  $1 - n^{-5}$  we have that

$$1 - \frac{Y_v}{\lambda d(v)} \in [9/10, 11/10].$$

**Analyzing noised degrees.** Recall that noised degree  $\hat{d}(v)$  is defined as  $\hat{d}(v) = d(v) + Z_v$ , where  $Z_v$  is drawn from  $\text{Lap}(8/\epsilon)$ . From Fact 2.5 we have

$$\Pr\left[|Z_v| > \frac{40 \log n}{\epsilon}\right] < n^{-5}.$$

Hence, with probability at least  $1 - n^{-5}$ , a vertex of degree at least  $T_0 + 40 \log n/\epsilon$  is in  $H$  defined on Line 1 of Algorithm 1. Also, with probability at least  $1 - n^{-5}$  a vertex with degree less than  $T_0 - 40 \log n/\epsilon$  is not in  $H$ .

**Combining the ingredients.** Define

$$T' = \max\left(\frac{400 \log n}{\lambda \epsilon}, \frac{2500 \cdot C^2 \cdot \log^2 n \cdot \log(1/\delta)}{\beta^2 \cdot \epsilon_{\text{agr}}^2}\right)$$

Our analysis shows that for a vertex  $v$  such that  $d(v) \geq T'$  the following holds with probability at least  $1 - 2n^{-5}$ :

- (i) The perturbation by  $\mathcal{E}_{u,v}$  in Definition 3.1 can be seen as multiplicatively perturbing  $\bar{\beta}_{u,v}$  by a number from the interval  $[-1/10, 1/10]$ .
- (ii) The perturbation of  $l(v)$  by  $Y_v$  can be seen as multiplicatively perturbing  $\bar{\lambda}_v$  by a number from the interval  $[-1/10, 1/10]$ .

Let  $T = T_0 + \frac{40 \log n}{\epsilon}$ . Let  $T_0 \geq T' + \frac{40 \log n}{\epsilon}$ . Note that this imposes a constraint on  $T_1$ , which is

$$T_1 \geq T' + \frac{40 \log n}{\epsilon} - \frac{8 \log(16/\delta)}{\epsilon}. \quad (17)$$

Then, following our analysis above, each vertex in  $H$  has degree at least  $T'$ , and each vertex of degree at least  $T$  is in  $H$ . Let  $E_{\leq T}$  be the set of edges incident to vertices which are not in  $H$ ; these edges are effectively removed from the graph. Observe that for a vertex  $u$  which do not belong to  $H$  it is irrelevant what  $\bar{\beta}_{u,\cdot}$  values are or what  $\bar{\lambda}_u$  is, as all its incident edges are removed. To conclude the proof, define  $\bar{\beta}^L = 0.9 \cdot \beta \cdot \bar{1}$ ,  $\bar{\beta}^U = 1.1 \cdot \beta \cdot \bar{1}$ ,  $\bar{\lambda}^L = 0.9 \cdot \lambda \cdot \bar{1}$ , and  $\bar{\lambda}^U = 1.1 \cdot \lambda \cdot \bar{1}$ . By Lemma 5.2 and Properties (i) and (ii) we have that

$$\text{cost}(\text{Algorithm 1}') \leq \text{cost}(\text{ALG-CC}(\bar{\beta}^L, \bar{\lambda}^L, E_{\leq T})) + \text{cost}(\text{ALG-CC}(\bar{\beta}^U, \bar{\lambda}^U, E_{\leq T})).$$

By Lemma B.2 the latter sum is upper-bounded by  $O(\text{OPT}/(\beta\lambda)) + O(n \cdot T/(1-4\beta)^3)$ . Note that we replace the condition  $5\beta + 2\lambda$  in the statement of Lemma B.2 by  $5\beta + 2\lambda < 1/1.1$  in this lemma so to account for the perturbations. Moreover, we can upper-bound  $T$  by

$$T \leq O\left(\frac{\log n}{\lambda\epsilon} + \frac{\log^2 n \cdot \log(1/\delta)}{\beta^2 \cdot \min(1, \epsilon^2)}\right).$$

In addition, all discussed bound hold across all events with probability at least  $1 - n^{-2}$ . This concludes the analysis.  $\square$

### B.3 Proof of Lemma 5.4

**Lemma 5.4.** *Consider all light vertices defined in Line 4 of Algorithm 1. Assume that  $5\beta + 2\lambda < 1/1.1$ . Then, with probability at least  $1 - n^{-2}$ , making as singleton clusters any subset of those light vertices increases the cost of clustering by  $O(\text{OPT}/(\beta \cdot \lambda)^2)$ , where OPT denotes the cost of the optimum clustering for the input graph.*

*Proof.* Consider first a single light vertex  $v$  which is not a singleton cluster. Let  $C$  be the cluster of  $\hat{G}'$  that  $v$  initially belongs to. We consider two cases. First, recall that from our proof of Lemma 5.3 that, with probability at least  $1 - n^{-2}$ , we have that  $0.9\lambda \leq \bar{\lambda}_v \leq 1.1\lambda$  and  $0.9\beta \leq \bar{\beta}_{u,v} \leq 1.1\beta$ , where  $\bar{\lambda}$  and  $\bar{\beta}$  are inputs to ALG-CC.

**Case 1:  $v$  has at least  $\bar{\lambda}_v/2$  fraction of neighbors outside  $C$ .** In this case, the cost of having  $v$  in  $C$  is already at least  $d(v) \cdot \bar{\lambda}_v/2 \geq d(v) \cdot 0.9 \cdot \lambda/2$ , while having  $v$  as a singleton has cost  $d(v)$ .

**Case 2:  $v$  has less than  $\bar{\lambda}_v/2$  fraction of neighbors outside  $C$ .** Since  $v$  is not in agreement with at least  $\bar{\lambda}_v$  fraction of its neighbors, this case implies that at least  $\bar{\lambda}_v/2 \geq 0.9 \cdot \lambda/2$  fraction of those neighbors are in  $C$ . We now develop a charging arguments to derive the advertised approximation.

Let  $x \in C$  be a vertex that  $v$  is not in a agreement with. Then, for a fixed  $x$  and  $v$  in *the same* cluster of  $\hat{G}'$ , there are at least  $O(d(v)\beta)$  vertices  $z$  (incident to  $x$  or  $v$ , but not to the other vertex) that the current clustering is paying for. In other words, the current clustering is paying for edges of the form  $\{z, x\}$  and  $\{z, v\}$ ; as a remark,  $z$  does not have to belong to  $C$ . Let  $Z(v)$  denote the *multiset* of all such edges for a given vertex  $v$ . We charge each edge in  $Z(v)$  by  $O(1/(\beta\lambda))$ .

On the other hand, making  $v$  a singleton increases the cost of clustering by at most  $d(v)$ . We now want to argue that there is enough charging so that we can distribute the cost  $d(v)$  (for making  $v$  a singleton cluster) over  $Z(v)$  and, moreover, do that for all light vertices  $v$  simultaneously. There are at least  $O(\beta \cdot d(v) \cdot \lambda \cdot d(v))$  edges in  $Z(v)$ ; recall that  $Z(v)$  is a multiset. We distribute uniformly the cost  $d(v)$  (for making  $v$  a singleton) across  $Z(v)$ , incurring  $O(1/(\beta \cdot \lambda \cdot d(v)))$  cost per an element of  $Z(v)$ .

Now it remains to comment on how many times an edge appears in the union of all  $Z(\cdot)$  multisets. Edge  $z_e = \{x, y\}$  is included in  $Z(\cdot)$  when  $x$  and its neighbor, or  $y$  and its neighbor are considered. Moreover, those neighbors belong to the same cluster of  $\hat{G}'$  and hence have similar degrees (i.e., as shown in the proof of Lemma B.2, their degrees differ by at most  $(1-4\beta)^2$  factor). Hence, an edge  $z_e \in Z(v)$  appears  $O(d(v))$  times across all  $Z(\cdot)$ , which concludes our analysis.  $\square$

## C Lower bound

In this section we show that any private algorithm for correlation clustering must incur at least  $\Omega(n)$  additive error in the approximation guarantee, regardless of its multiplicative approximation ratio. The following is a restatement of Theorem 1.2.

**Theorem C.1.** *Let  $\mathcal{A}$  be an  $(\epsilon, \delta)$ -DP algorithm for correlation clustering on unweighted complete graphs, where  $\epsilon \leq 1$  and  $\delta \leq 0.1$ . Then the expected cost of  $\mathcal{A}$  is at least  $n/20$ , even when restricted to instances whose optimal cost is 0.*

*Proof.* Fix an even number  $n = 2m$  of vertices and consider the fixed perfect matching  $(1, 2), (3, 4), \dots, (2m-1, 2m)$ . For every vector  $\tau \in \{0, 1\}^m$  we consider the instance  $I_\tau$  obtained by having plus-edges  $(2i-1, 2i)$  for those  $i = 1, \dots, m$  where  $\tau_i = 1$  (and minus-edges for  $i$  with  $\tau_i = 0$ , as well as everywhere outside this perfect matching). Note that this instance is a complete unweighted graph and has optimal cost 0.

For  $\tau \in \{0, 1\}^m$  and  $i \in \{1, \dots, m\}$  define  $p_\tau^{(i)}$  to be the marginal probability that vertices  $2i-1$  and  $2i$  are in the same cluster when  $\mathcal{A}$  is run on the instance  $I_\tau$ .

Finally, for  $\sigma \in \{0, 1\}^{m-1}$ ,  $i \in \{1, \dots, m\}$  and  $b \in \{0, 1\}$  let  $\sigma[i \leftarrow b]$  be the vector  $\sigma$  with the bit  $b$  inserted at the  $i$ -th position to obtain an  $m$ -dimensional vector (note that  $\sigma$  is  $(m-1)$ -dimensional). Note that  $I_{\sigma[i \leftarrow 0]}$  and  $I_{\sigma[i \leftarrow 1]}$  are adjacent instances. Thus  $(\epsilon, \delta)$ -privacy gives

$$p_{\sigma[i \leftarrow 1]}^{(i)} \leq e^\epsilon \cdot p_{\sigma[i \leftarrow 0]}^{(i)} + \delta \quad (18)$$

for all  $i$  and  $\sigma$ .

Towards a contradiction assume that  $\mathcal{A}$  achieves expected cost at most  $0.05n = 0.1m$  on every instance  $I_\tau$ . In particular, the expected cost on the matching minus-edges is at most  $0.1m$ , i.e.,

$$0.1m \geq \sum_{i: \tau_i=0} p_\tau^{(i)}.$$

Summing this up over all vectors  $\tau \in \{0, 1\}^m$  we get

$$2^m \cdot 0.1m \geq \sum_{\tau \in \{0,1\}^m} \sum_{i: \tau_i=0} p_\tau^{(i)} = \sum_i \sum_{\sigma \in \{0,1\}^{m-1}} p_{\sigma[i \leftarrow 0]}^{(i)} \quad (19)$$

and similarly since the expected cost on the matching plus-edges is at most  $0.1m$ , we get

$$\begin{aligned} 2^m \cdot 0.1m &\geq \sum_{\tau \in \{0,1\}^m} \sum_{i: \tau_i=1} (1 - p_\tau^{(i)}) \\ &= \sum_i \sum_{\sigma \in \{0,1\}^{m-1}} (1 - p_{\sigma[i \leftarrow 1]}^{(i)}) \\ &\stackrel{(18)}{\geq} \sum_i \sum_{\sigma \in \{0,1\}^{m-1}} (1 - e^\epsilon \cdot p_{\sigma[i \leftarrow 0]}^{(i)} - \delta) \\ &= (1 - \delta) \cdot m \cdot 2^{m-1} - e^\epsilon \cdot \sum_i \sum_{\sigma \in \{0,1\}^{m-1}} p_{\sigma[i \leftarrow 0]}^{(i)} \\ &\stackrel{(19)}{\geq} (1 - \delta) \cdot m \cdot 2^{m-1} - e^\epsilon \cdot 2^m \cdot 0.1m \\ &\geq 0.45 \cdot m \cdot 2^m - 0.1e \cdot 2^m \cdot m. \end{aligned}$$

Dividing by  $2^m \cdot m$  gives  $0.1 \geq 0.45 - 0.1e$ , which is a contradiction.  $\square$
